# Supplementary material for: The influencing factors for distribution patterns of resident and migrant bird species richness along elevational gradients
Source: PeerJ. 2022 Apr 29;10:e13258. doi: 10.7717/peerj.13258 (PMC9059752; doi:10.7717/peerj.13258)
Supplement: Supplemental Information 3 — All bird data and environmental factors used for statistical analysis. [file peerj-10-13258-s003.xlsx]

## Sheet: Sheet1
y	x	elevation	species	resident	migrant	mean_temp	SL	TL	hh
35.295	127.527	1360	7	3	4	10.3467	1	3	0.279733
35.2946	127.523	1270	11	6	5	10.4547	3	3	0.639423
35.3025	127.514	1145	9	4	5	11.2243	2	3	0.412642
35.3082	127.51	1010	11	7	4	11.5377	2	3	0.615747
35.2951	127.526	1350	6	2	4	10.36	3	1	0.319461
35.2966	127.523	1283	7	4	3	10.289	3	3	0
35.3028	127.514	1143	7	4	3	11.2333	1	3	0.38498
35.3089	127.51	1015	6	4	2	11.5651	1	3	0.559795
35.3014	127.504	994	8	4	4	12.4718	3	3	0.170439
35.3003	127.499	914	11	8	3	12.7774	2	3	0.85217
35.3006	127.495	892	10	7	3	13.2903	1	3	0.660898
35.2983	127.493	850	10	7	3	13.5898	2	3	0.969053
35.2944	127.492	774	9	6	3	13.7748	2	2	0.830328
35.292	127.49	734	10	6	4	14.0073	1	3	0.743317
35.2916	127.493	606	5	2	3	13.759	3	3	0.252097
35.2921	127.495	650	3	2	1	13.3543	2	3	0.0800279
35.2854	127.491	580	9	4	5	14.2837	2	2	0.705949
35.2859	127.492	580	3	3	0	14.16	1	2	1.24211
35.28	127.488	413	6	5	1	14.8246	1	2	0.789743
35.2771	127.488	428	6	6	0	14.9158	1	1	0.167582
35.2751	127.486	426	6	5	1	15.07	2	3	0.213445
35.2777	127.48	316	3	2	1	15.5309	1	1	0.157556
35.2765	127.478	303	7	7	0	15.6067	1	1	0.489206
35.272	127.479	271	8	7	1	15.9094	1	1	0.294364
35.2698	127.477	229	7	4	3	16.0567	2	1	1.23906
35.3208	127.586	1024	8	5	3	10.682	2	3	0.0743614
35.3181	127.585	1080	8	6	3	10.4111	2	3	0
35.3164	127.585	1115	10	6	4	10.3377	2	3	0
35.3157	127.586	1148	12	7	5	10.1557	1	3	0
35.3298	127.587	882	6	4	2	11.7771	1	3	0.171902
35.3234	127.588	974	7	3	4	11.2361	2	3	0.129025
35.3264	127.589	921	10	5	5	11.3826	3	3	0.167042
35.3276	127.59	906	11	7	4	11.4781	1	3	0.152909
35.3513	127.588	652	10	5	5	13.3032	1	2	0.170985
35.379	127.584	473	12	7	5	14.4358	2	3	0.627947
35.3115	127.584	1270	9	6	3	9.99001	3	2	0
35.3104	127.584	1269	7	4	3	9.99068	2	2	0
35.3094	127.585	1323	3	1	2	10.0514	3	0	0
35.3088	127.585	1326	4	2	2	10.053	3	0	0
35.3592	127.586	590	5	4	1	13.6426	1	3	0.205545
35.4069	127.617	394	11	10	1	15.5972	1	1	1.02014
35.3846	127.591	453	6	2	4	14.4296	1	2	1.38259
35.3594	127.586	588	4	4	0	13.6523	1	1	0.213666
35.3446	127.589	692	8	5	3	12.8173	1	2	0.167221
35.3356	127.587	783	5	4	1	12.3586	1	2	0.274166
35.3408	127.589	732	6	5	1	12.7074	1	2	0.196848
35.3208	127.649	1031	11	4	7	10.6544	2	3	0
35.3201	127.649	1018	9	6	3	10.6477	3	3	0
35.3184	127.649	960	9	5	4	10.7278	2	3	0
35.314	127.641	966	6	2	4	11.687	2	3	0.461367
35.3091	127.635	880	10	5	5	12.6673	2	3	1.03251
35.3075	127.636	819	9	6	3	12.6049	3	3	0
35.3066	127.628	744	8	5	3	13.085	3	3	0
35.3074	127.624	723	9	7	2	12.3426	3	3	0.11938
35.3028	127.634	638	9	5	4	13.4779	3	3	1.17437
35.3025	127.636	608	8	4	4	13.4748	3	3	0.986693
35.3005	127.634	573	7	6	1	13.6441	3	1	1.37537
35.2986	127.636	550	11	8	3	13.5925	1	3	0.558151
35.2955	127.643	480	10	5	5	14.1056	0	3	0.449568
35.2906	127.643	427	11	7	4	14.5533	1	2	0.8004
35.2861	127.651	365	12	9	3	15.0668	3	1	1.28778
35.2785	127.653	305	11	8	3	15.6147	1	2	1.06836
35.2725	127.651	276	10	8	2	15.6021	1	2	1.37029
35.27	127.653	284	5	2	3	15.7314	0	3	0.305779
35.3233	127.647	1140	8	5	3	10.6768	3	1	0
35.3236	127.646	1172	9	6	3	10.6491	3	1	0
35.3245	127.645	1221	8	4	4	10.5692	3	1	0
35.3253	127.644	1275	7	3	4	10.5101	3	0	0.108471
35.326	127.643	1313	4	2	2	10.5066	3	1	0.482578
35.3256	127.643	1314	5	3	2	10.5038	3	0	0.581167
35.3535	127.637	769	9	6	3	13.481	3	3	0.08021
35.3565	127.636	710	14	9	5	13.4223	3	3	0.388033
35.3617	127.637	670	12	8	4	13.616	3	3	0.994309
35.3591	127.639	642	13	9	4	13.9969	2	2	0.828323
35.3596	127.641	586	15	11	4	14.3295	3	3	1.16369
35.3601	127.643	560	8	5	3	14.4998	3	3	1.22126
35.3369	127.631	1033	7	1	6	10.9995	2	3	0
35.3393	127.63	1041	9	4	5	11.2504	2	3	0
35.3407	127.633	987	10	6	4	11.7888	1	3	0
35.3443	127.631	944	9	4	5	11.9937	1	3	0
35.35	127.632	869	9	6	3	12.6975	1	3	0.431744
35.3513	127.633	820	10	6	4	12.826	1	3	0.6502
35.326	127.642	1320	11	4	7	10.5515	3	1	0.687205
35.3267	127.642	1311	6	1	5	10.5588	1	2	0.67347
35.3271	127.641	1267	9	4	5	10.6756	2	2	0.692746
35.3281	127.641	1230	10	5	5	10.7453	2	2	0.329104
35.3294	127.634	1170	10	6	4	10.5984	1	2	0
35.333	127.632	1120	11	5	6	10.7789	2	3	0
35.3655	127.649	470	6	4	2	14.7679	3	1	1.17949
35.3644	127.649	484	5	4	1	14.7061	3	1	1.05945
35.3728	127.658	384	4	2	2	15.5287	1	1	1.29592
35.3764	127.668	385	6	4	2	15.6195	1	1	1.32039
35.3962	127.663	295	7	6	1	16.0909	3	1	1.87938
35.3938	127.662	294	6	4	2	16.043	2	2	1.71402
35.3479	127.763	1130	9	3	6	11.2635	3	3	0
35.3495	127.763	1117	8	3	5	11.3178	3	3	0
35.3531	127.766	1080	9	6	3	11.5625	2	3	0
35.3542	127.765	1034	7	3	4	11.6003	3	3	0
35.3566	127.766	980	7	3	4	11.9896	3	3	0
35.3582	127.767	920	10	5	5	12.1941	3	3	0
35.3659	127.766	831	12	5	7	12.684	3	3	0
35.367	127.768	808	7	4	3	12.8008	3	3	0
35.3697	127.767	767	12	6	6	12.8059	3	3	0
35.3712	127.768	729	10	6	4	12.825	3	3	0.888011
35.3731	127.774	673	14	10	4	13.5135	3	3	1.44553
35.3719	127.774	646	11	8	3	13.6334	3	3	0.461605
35.3705	127.783	582	5	4	1	13.9551	2	3	1.0373
35.3683	127.786	559	5	3	2	14.2649	1	3	0.214112
35.3626	127.796	448	8	6	2	14.6855	1	2	1.41616
35.3608	127.798	430	9	6	3	14.8082	2	1	0.689294
35.3583	127.807	383	8	5	3	14.8017	1	3	0.361244
35.3582	127.813	347	7	6	1	14.8928	2	2	0.140784
35.3526	127.816	292	7	4	3	15.1599	1	3	1.06925
35.3457	127.823	242	10	10	0	16.0853	1	2	1.75191
35.346	127.758	1231	7	3	4	10.4571	1	2	0
35.3474	127.757	1238	6	2	4	10.3774	3	1	0
35.3476	127.754	1335	5	2	3	10.1058	1	2	0
35.3489	127.753	1336	5	1	4	10.028	3	1	0
35.3273	127.738	1313	7	2	5	9.91084	3	1	0.693083
35.3279	127.741	1235	9	5	4	10.4598	2	3	0
35.3273	127.744	1165	7	2	5	10.6274	2	3	0.668391
35.3271	127.751	1018	7	6	1	11.2174	3	3	0.296881
35.3246	127.754	968	5	2	3	11.5929	2	3	0.837969
35.3272	127.738	1316	8	4	4	9.91938	3	3	0.687375
35.3276	127.741	1228	8	4	4	10.5079	3	3	0
35.3278	127.745	1165	7	2	5	10.5067	3	3	0.55029
35.3272	127.751	1004	6	2	4	11.2556	3	3	0.395321
35.3235	127.754	986	8	2	6	11.6718	3	3	0.679469
35.3185	127.753	879	10	3	7	12.4305	2	3	0.806025
35.313	127.754	813	9	5	4	12.8159	3	2	0.52773
35.3129	127.751	782	12	9	3	12.86	2	3	0.92716
35.3111	127.751	744	10	8	2	13.0017	3	3	0.664463
35.3102	127.752	698	11	5	6	13.1642	3	3	0.681769
35.3059	127.75	651	12	10	2	13.5747	3	2	1.21293
35.3006	127.751	568	7	5	2	13.9819	3	1	1.01637
35.2997	127.753	567	9	7	2	14.1809	3	1	1.08244
35.2946	127.757	495	8	7	1	14.4095	3	1	0.797857
35.2884	127.756	463	9	7	2	14.7852	1	0	1.15989
35.2853	127.761	394	9	6	3	15.0154	1	2	1.17826
35.2863	127.769	388	6	3	3	14.9894	3	1	1.6053
35.2693	127.778	294	7	4	3	15.7675	1	1	1.7107
35.2649	127.779	271	5	5	0	15.8368	1	1	1.43288
