# Supplementary material for: The influencing factors for distribution patterns of resident and migrant bird species richness along elevational gradients
Source: PeerJ journal article supplement (doi:10.7717/peerj.13258), 2022-04-29
Supplement: Supplemental_S1.pdf [file Supplemental_S1.pdf]

**Table S1. The summary of piecewise structural equation modelling (pSEM) for testing of the hypotheses of resident and migrant distribution.** Significant paths ( $P < 0.05$ ) are indicated in bold. Critical value indicate the strength of the relationship.

| Processes                                      | Predictor variable    | Response variable         | Estimate | Critical value | <i>P</i> -value  | SE     |
|------------------------------------------------|-----------------------|---------------------------|----------|----------------|------------------|--------|
| Common                                         | Elevation             | Mean spring temperature   | -0.69    | -13.94         | <b>&lt;0.001</b> | -0.004 |
|                                                | Elevation             | Understory vegetation     | 0.34     | 2.57           | <b>0.011</b>     | 0.0009 |
|                                                | Elevation             | Overstory vegetation      | 0.14     | 1.67           | 0.096            | 0.0004 |
|                                                | Elevation             | Habitat diversity         | -0.68    | -5.84          | <b>&lt;0.001</b> | -0.001 |
| Hypotheses regarding resident species richness | Mean temperature      | Resident species richness | 0.32     | 2.27           | <b>0.025</b>     | 0.36   |
|                                                | Understory vegetation | Resident species richness | 0.07     | 0.80           | 0.426            | 0.16   |
|                                                | Overstory vegetation  | Resident species richness | 0.16     | 1.79           | 0.076            | 0.38   |
|                                                | Habitat diversity     | Resident species richness | 0.13     | 1.12           | 0.263            | 0.54   |
| Hypotheses regarding migrant species richness  | Mean temperature      | Migrant species richness  | -0.48    | -4.86          | <b>&lt;0.001</b> | -0.41  |
|                                                | Understory vegetation | Migrant species richness  | 0.11     | 1.44           | 0.159            | 0.21   |
|                                                | Overstory vegetation  | Migrant species richness  | 0.34     | 4.85           | <b>&lt;0.001</b> | 0.60   |
|                                                | Habitat diversity     | Migrant species richness  | 0.14     | 1.46           | 0.147            | 0.43   |
