# Supplementary material for: The influencing factors for distribution patterns of resident and migrant bird species richness along elevational gradients
Source: PeerJ journal article supplement (doi:10.7717/peerj.13258), 2022-04-29
Supplement: Supplemental_S2.pdf [file Supplemental_S2.pdf]

**Table S2. Simple linear regressions according to the hypotheses of processes. Bolds indicate a significant relationship between variables.**

| Processes                                      | Response variable         | predictor variable    | Coefficient ( $\beta$ ) | R <sup>2</sup> | F     | P-value          |
|------------------------------------------------|---------------------------|-----------------------|-------------------------|----------------|-------|------------------|
| Hypotheses regarding resident species richness | Resident species richness | Mean temperature      | 0.43±0.090              | 0.138          | 22.51 | <b>&lt;0.001</b> |
|                                                |                           | Understory vegetation | -0.08±0.202             | 0.001          | 0.162 | 0.688            |
|                                                |                           | Overstory vegetation  | 0.25±0.196              | 0.011          | 1.671 | 0.198            |
|                                                |                           | Habitat diversity     | 1.23±0.344              | 0.083          | 12.75 | <b>&lt;0.001</b> |
| Hypotheses regarding migrant species richness  | Migrant species richness  | Mean temperature      | -0.41±0.063             | 0.237          | 43.49 | <b>&lt;0.001</b> |
|                                                |                           | Understory vegetation | 0.43±0.147              | 0.057          | 8.508 | <b>0.004</b>     |
|                                                |                           | Overstory vegetation  | 0.70±0.134              | 0.164          | 27.4  | <b>&lt;0.001</b> |
|                                                |                           | Habitat diversity     | -0.86±0.258             | 0.073          | 11.07 | <b>0.001</b>     |
